# Supplementary material for: AKAPs-PKA disruptors increase AQP2 activity independently of vasopressin in a model of nephrogenic diabetes insipidus
Source: PubMed Central journal article supplement (PMC5897355; doi:10.1038/s41467-018-03771-2), 2018-04-12
Supplement: 41467_2018_3771_MOESM1_ESM.pdf [file 41467_2018_3771_MOESM1_ESM.pdf]

**Supplementary Information**

**Title: AKAPs-PKA disruptors increase AQP2 activity independently of vasopressin in a model of nephrogenic diabetes insipidus**

**Ando et al.**

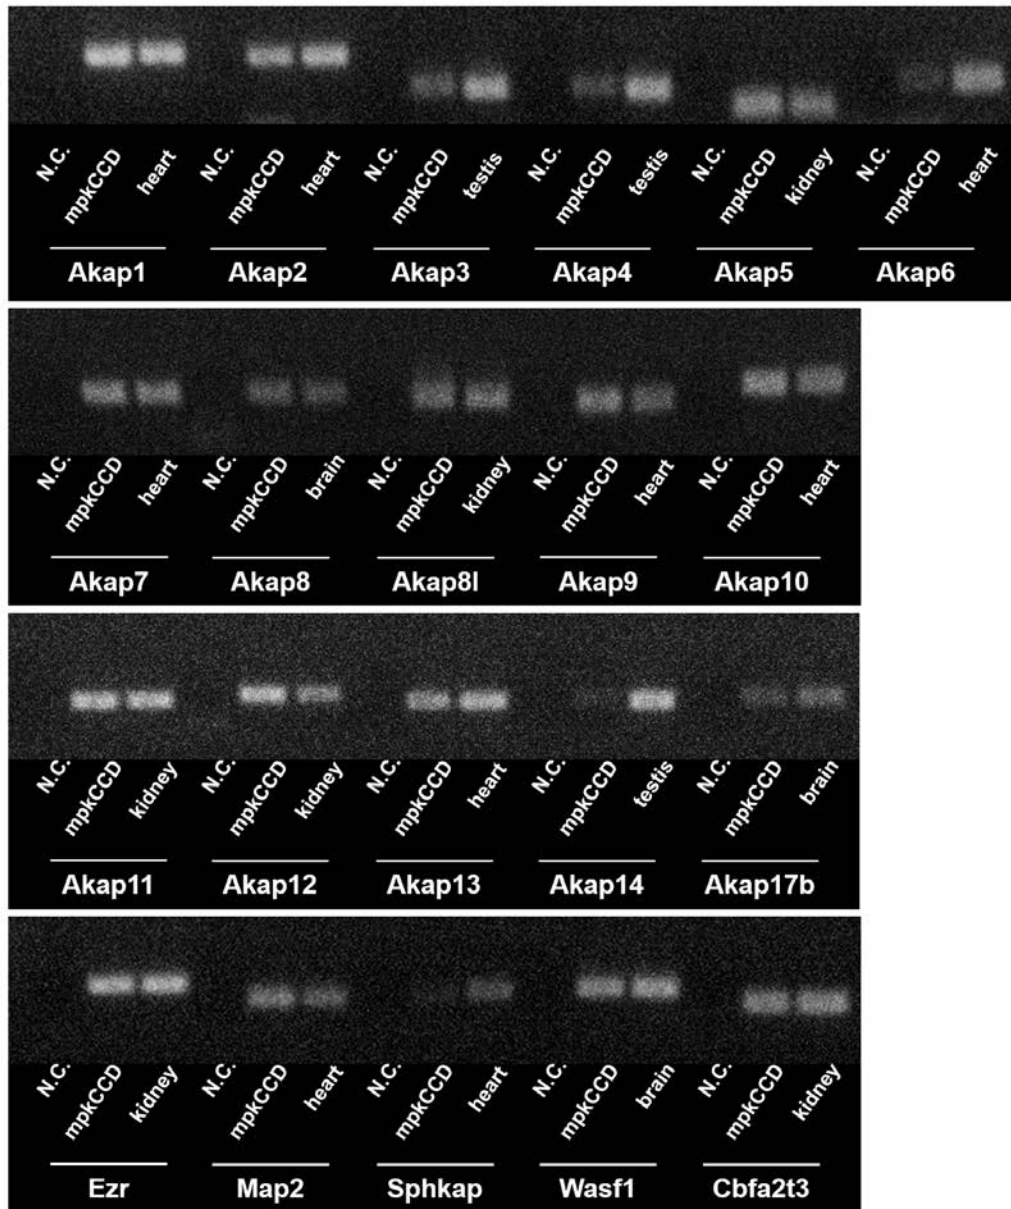

**Supplementary Figure 1.** Representative endogenous AKAPs are expressed in the mpkCCD cells. mRNA was extracted from the mpkCCD cells and was treated with DNase before RT-PCR assessment. N.C. indicates negative control (water in place of cDNA); cDNA from heart, testis, kidney, and brain of C57BL/6 mouse are used as positive control.

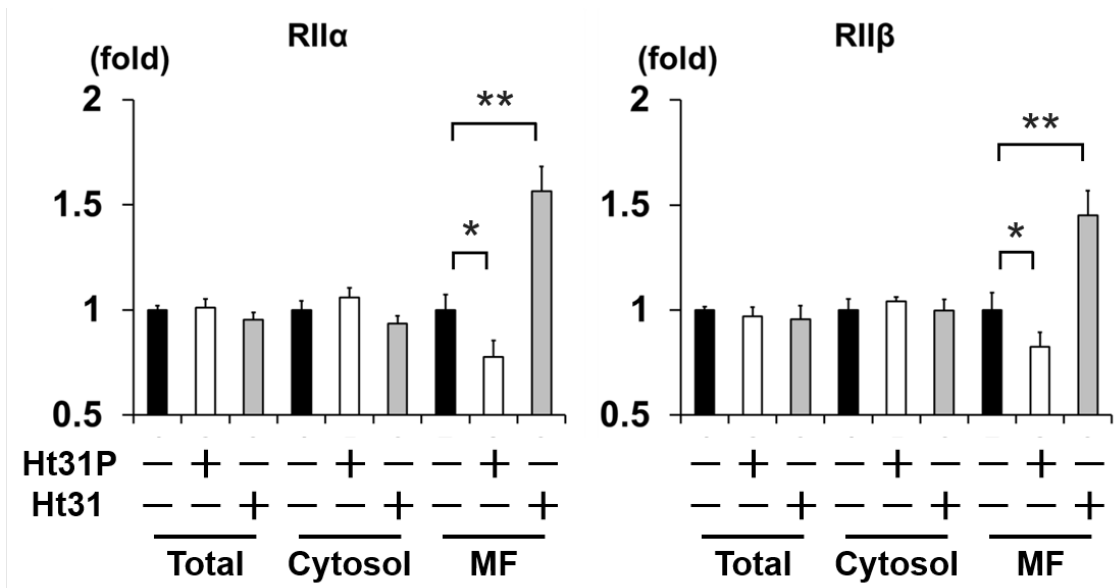

**Supplementary Figure 2.** Ht31 increases protein expression of PKA RII $\alpha/\beta$  in the membrane fraction. Densitometric analysis of Figure 1e. Bands of PKA RII  $\alpha/\beta$  were quantified by densitometric analysis, and the results are presented in the bar graphs as the fold change, as compared with the values of the control cells. Bars are mean values  $\pm$  SD of three experiments. Tukey, \* $p < 0.05$ , \*\* $p < 0.01$ .

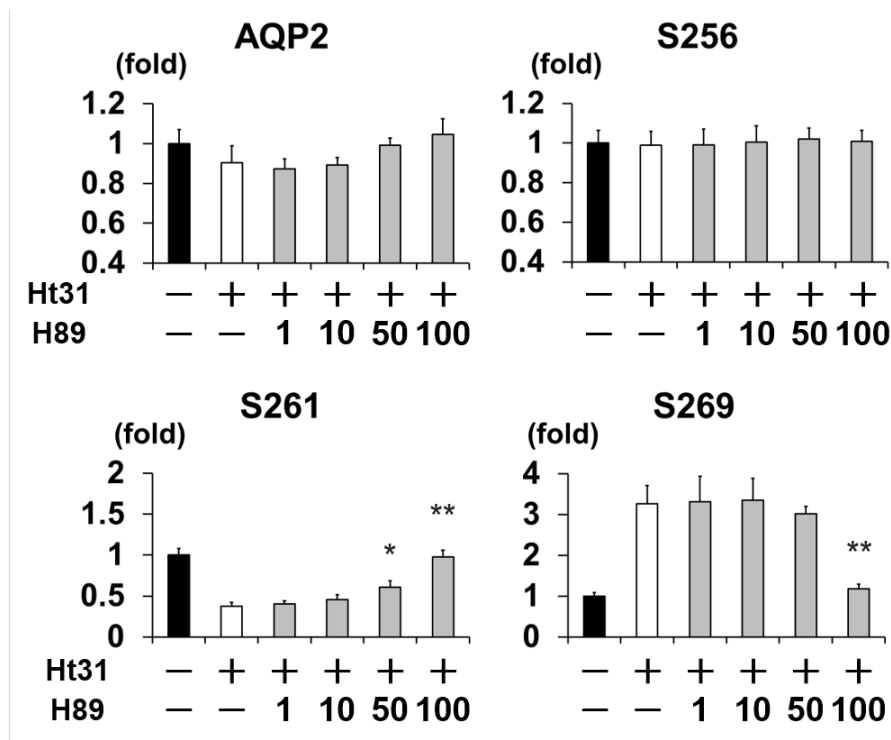

**Supplementary Figure 3.** Ht31 alters AQP2 phosphorylation at S261 and S269.

Densitometric analysis of Figure 2b. Non-glycosylated AQP2 bands were quantified by densitometric analysis and the results are presented in the bar graphs as the fold change, as compared to the values of the control cells. Bars are mean values  $\pm$  SD of three experiments. Asterisk indicates a significant difference, as compared with Ht31-treated cells. Tukey,  $*p < 0.05$ ,  $**p < 0.01$ .

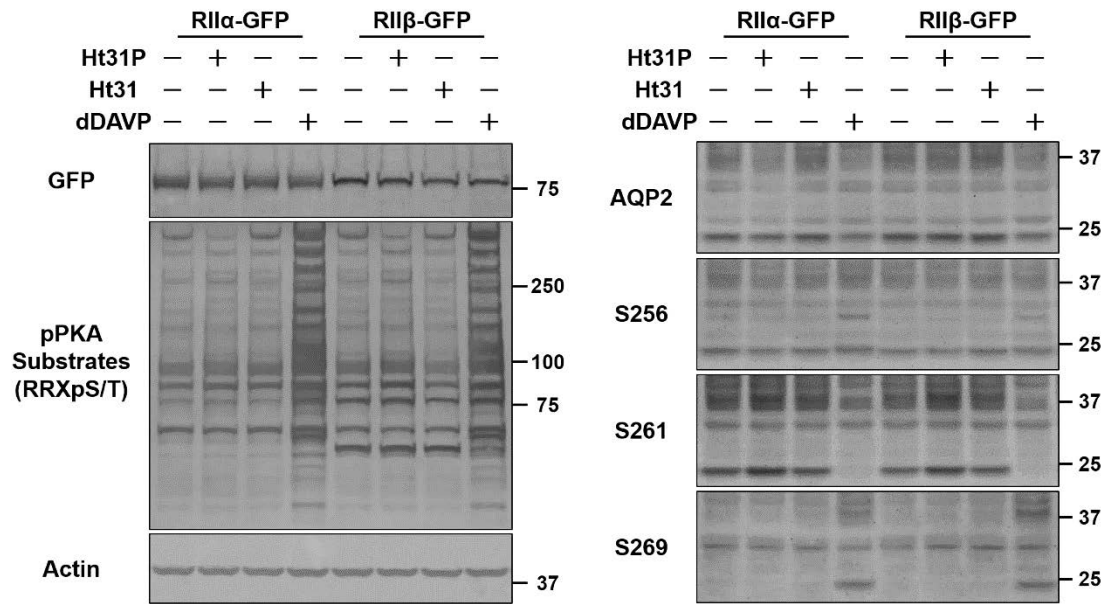

**Supplementary Figure 4.** Overexpression of PKA RII $\alpha/\beta$  inhibits the Ht31-induced phosphorylation of PKA substrates and AQP2. Stable cell lines that express PKA RII $\alpha$ -GFP or PKA RII $\beta$ -GFP were generated. Ht31P (50  $\mu$ M), Ht31 (50  $\mu$ M), or dDAVP (1 nM) was added to the basolateral side of the mpkCCD cells for 1 h. Representative blots of three independent experiments are shown.

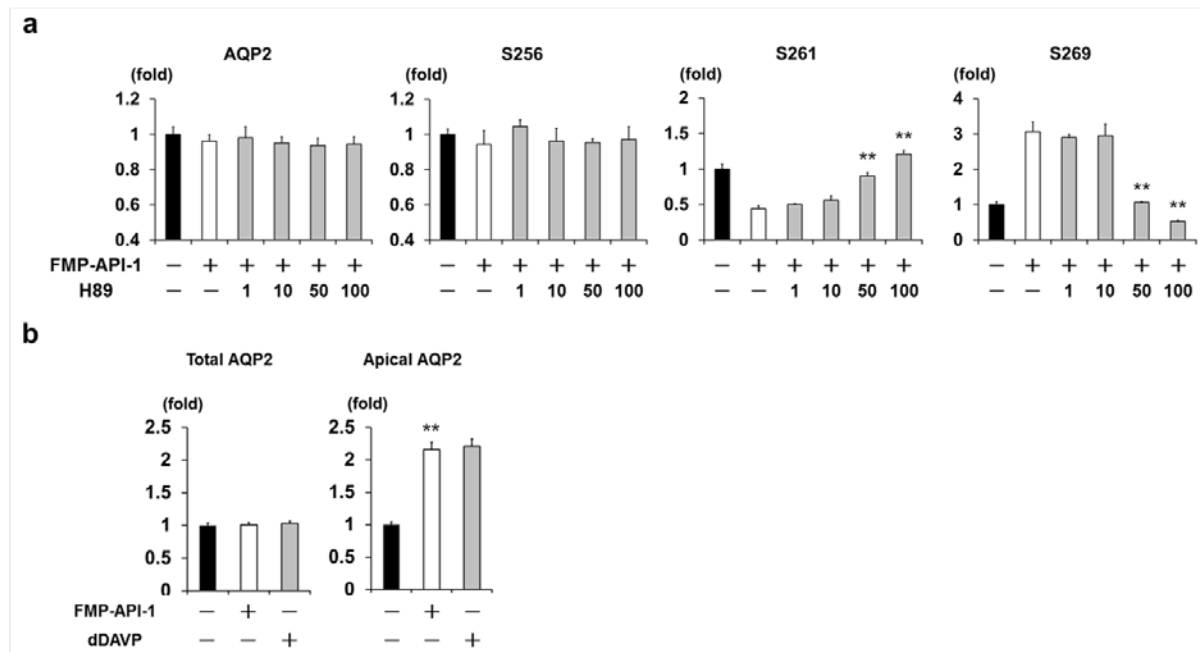

**Supplementary Figure 5.** FMP-API-1 alters AQP2 phosphorylation and increases apical AQP2 expression. **(a)** Densitometric analysis of Figure 4b. Non-glycosylated AQP2 bands were quantified by densitometric analysis, and the results are presented in the bar graphs as the fold change, as compared to the values of the control cells. Bars are mean values  $\pm$  SD of three experiments. Asterisk indicates a significant difference compared with FMP-API-1-treated cells. Tukey,  $**p < 0.01$ . **(b)** Densitometric analysis of Figure 4d. Non-glycosylated total and apical (biotinylated) AQP2 bands were quantified by densitometric analysis, and the results are presented in the bar graphs as fold change, as compared to the values of the control cells. Bars are mean values  $\pm$  SD of three experiments. Asterisk indicates a significant difference compared with control. Tukey,  $**p < 0.01$ .

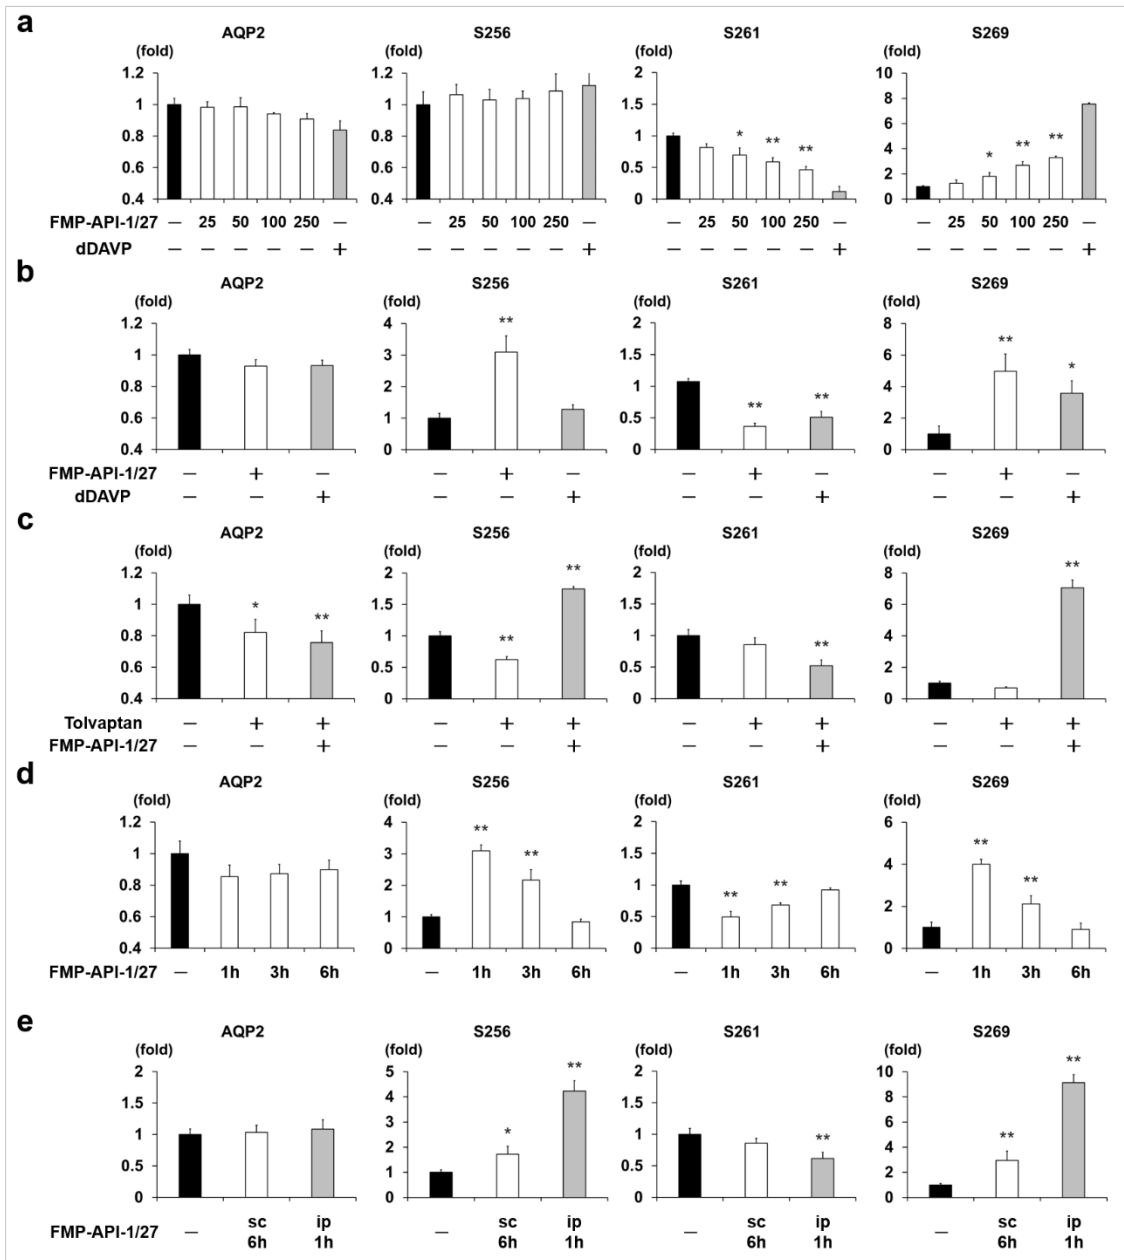

**Supplementary Figure 6.** FMP-API-1/27 robustly activates AQP2. (a) Densitometric analysis of Figure 5b. Non-glycosylated AQP2 bands were quantified by densitometric analysis, and the results are presented in the bar graphs as the fold change, as compared to

the values of the control cells. Bars are mean values  $\pm$  SD of three experiments. Tukey,  $*p < 0.05$ ,  $**p < 0.01$ . (**b-e**) Densitometric analysis of Figure 5c,d,f. Non-glycosylated AQP2 bands were quantified by densitometric analysis, and the results are presented in the bar graphs as the fold change, as compared to the values of the control mouse kidneys. Bars are mean values  $\pm$  SD of four experiments. Tukey,  $*p < 0.05$ ,  $**p < 0.01$ .



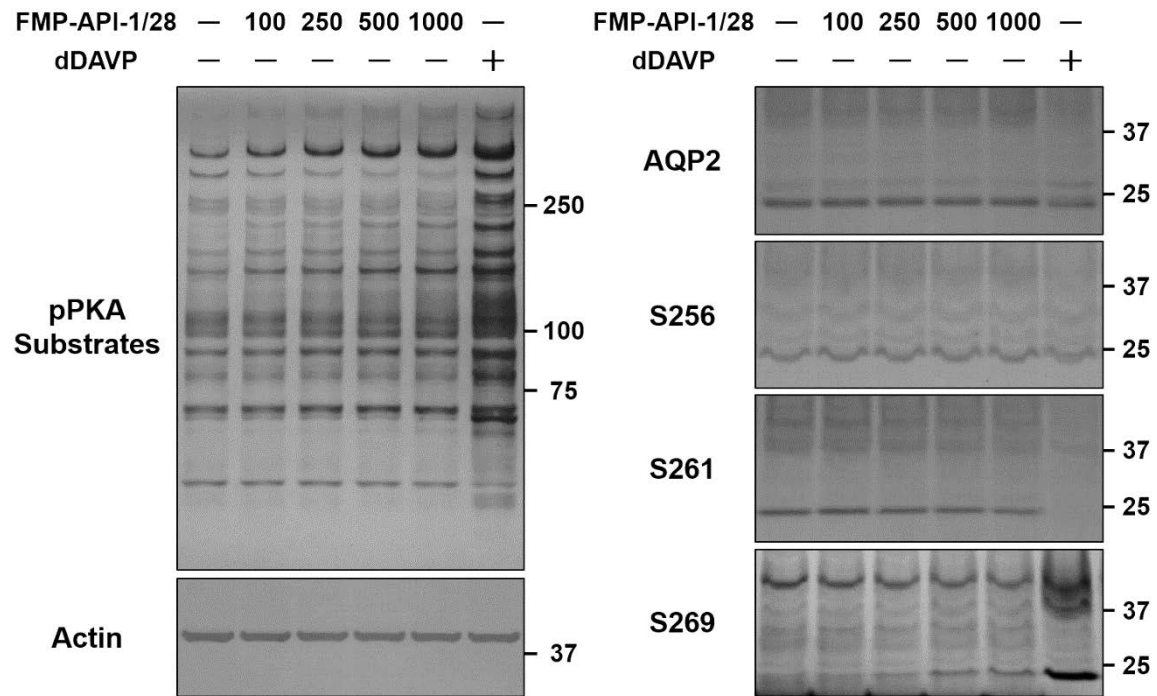

**Supplementary Figure 7.** FMP-API-1/28 dose-dependently induces phosphorylation of PKA substrates and AQP2. FMP-API-1/28 (100–1000  $\mu$ M) was added to the basolateral side of the mpkCCD cells for 1 h. Representative blots of three independent experiments are shown.

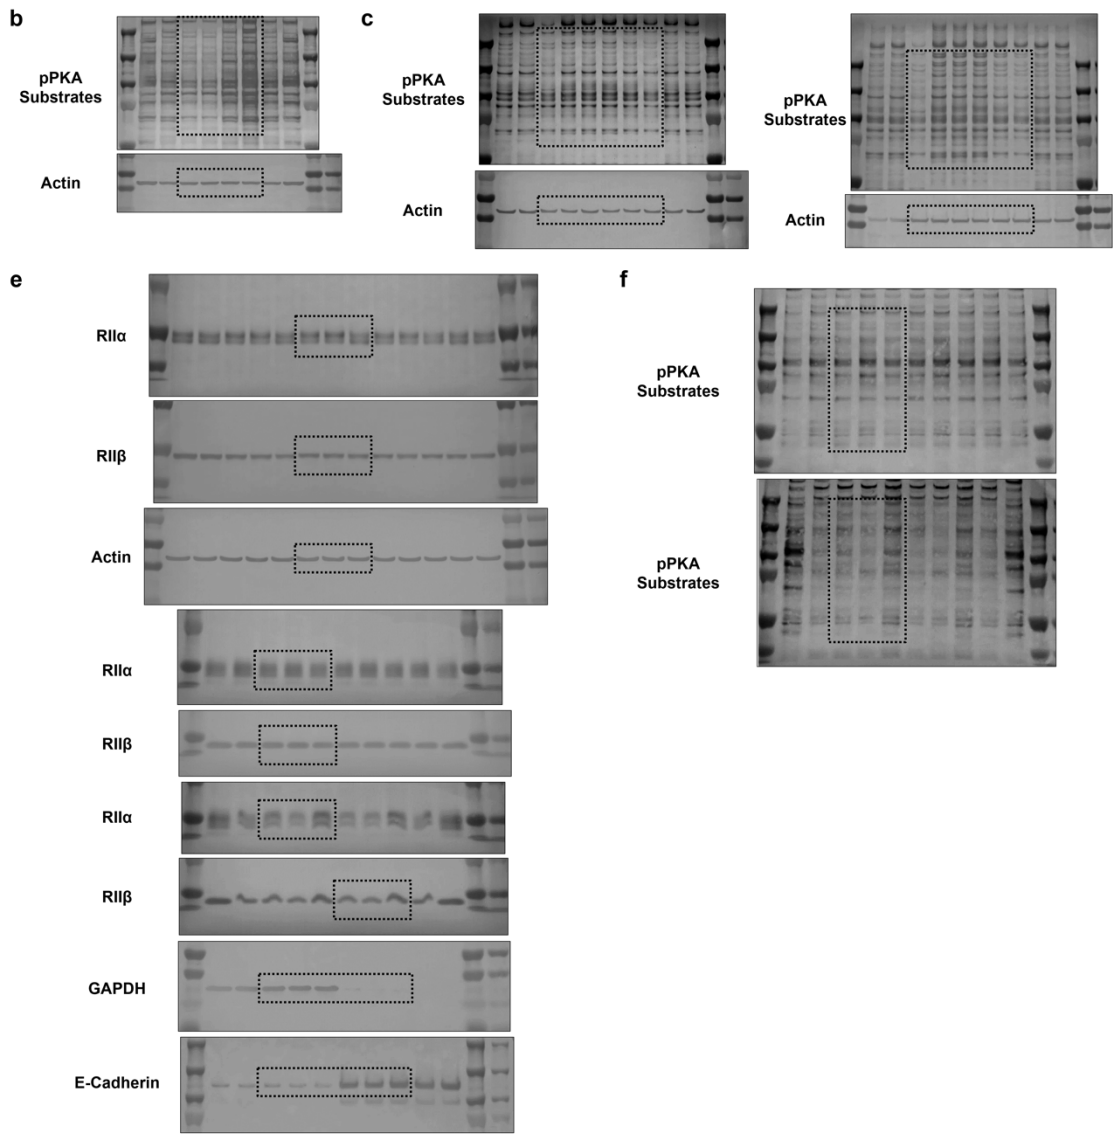

**Supplementary Figure 8.** Uncropped western blots of Figure 1.

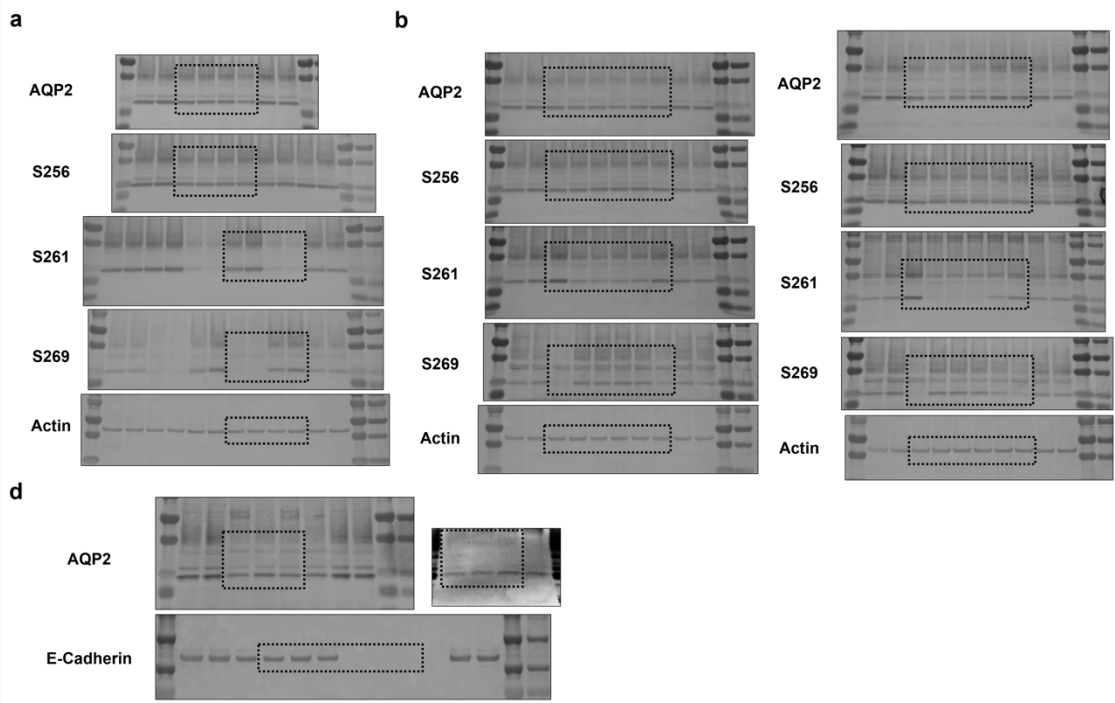

**Supplementary Figure 9.** Uncropped western blots of Figure 2.

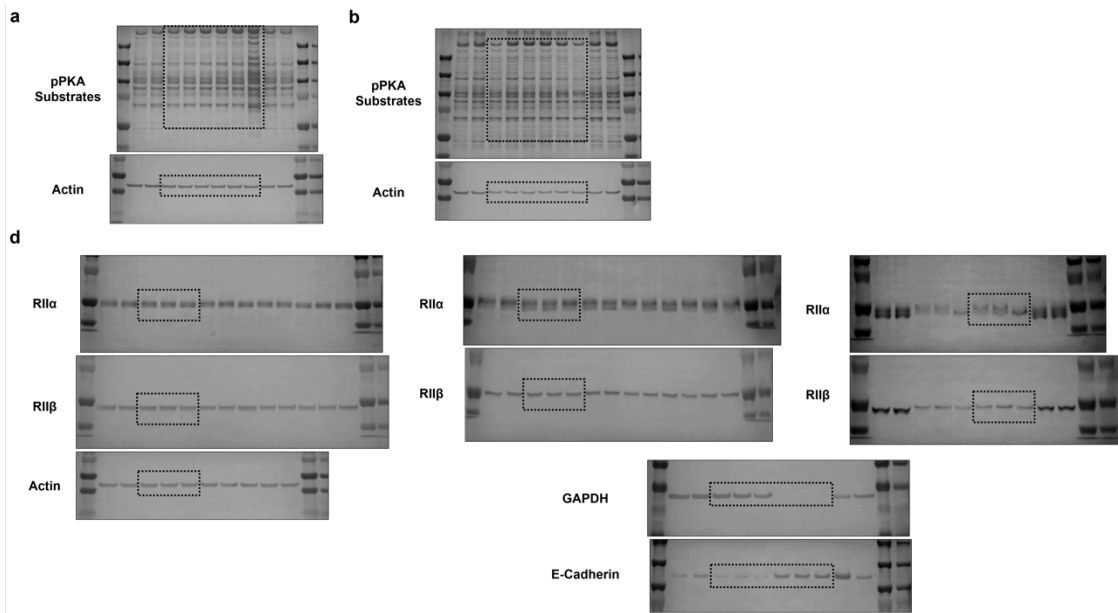

**Supplementary Figure 10.** Uncropped western blots of Figure 3.

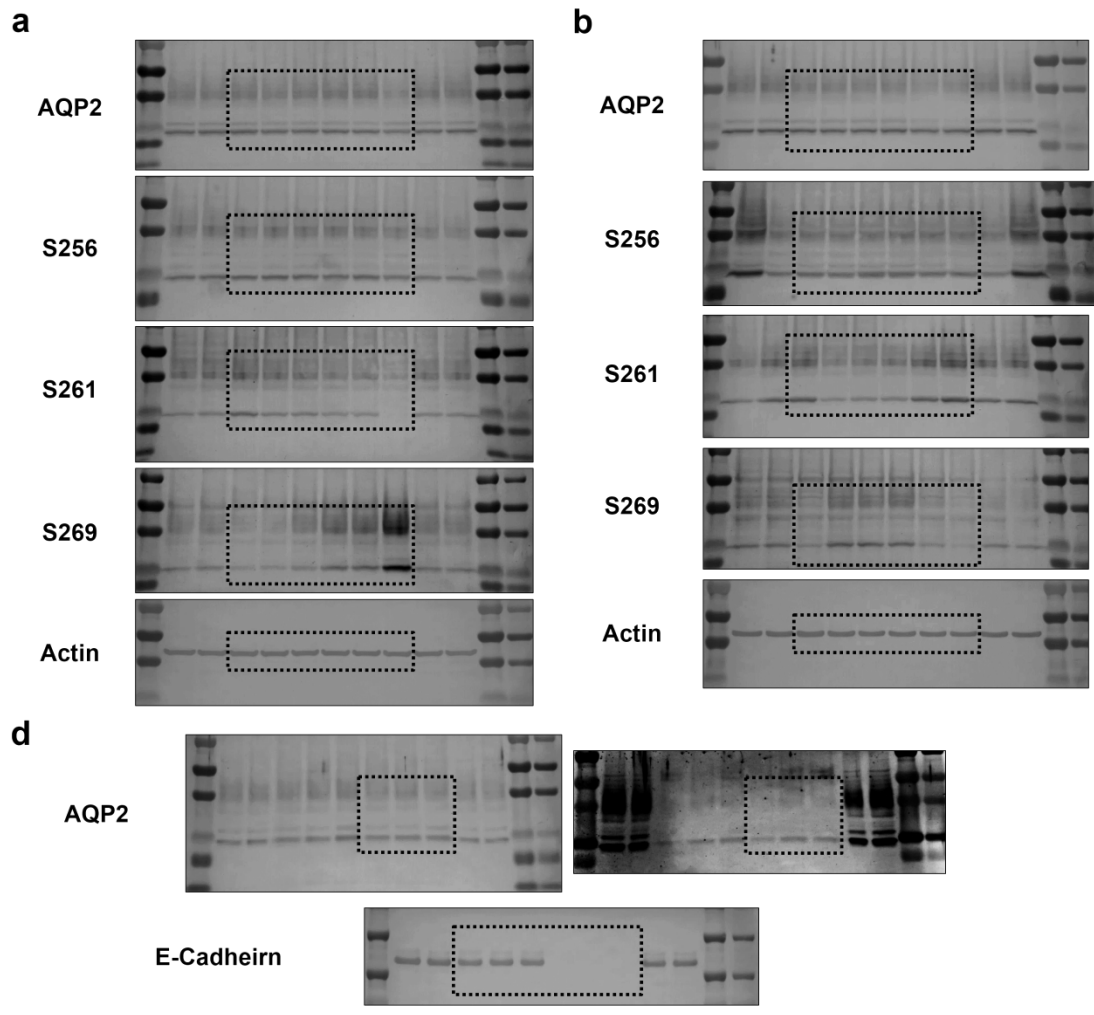

**Supplementary Figure 11.** Uncropped western blots of Figure 4.

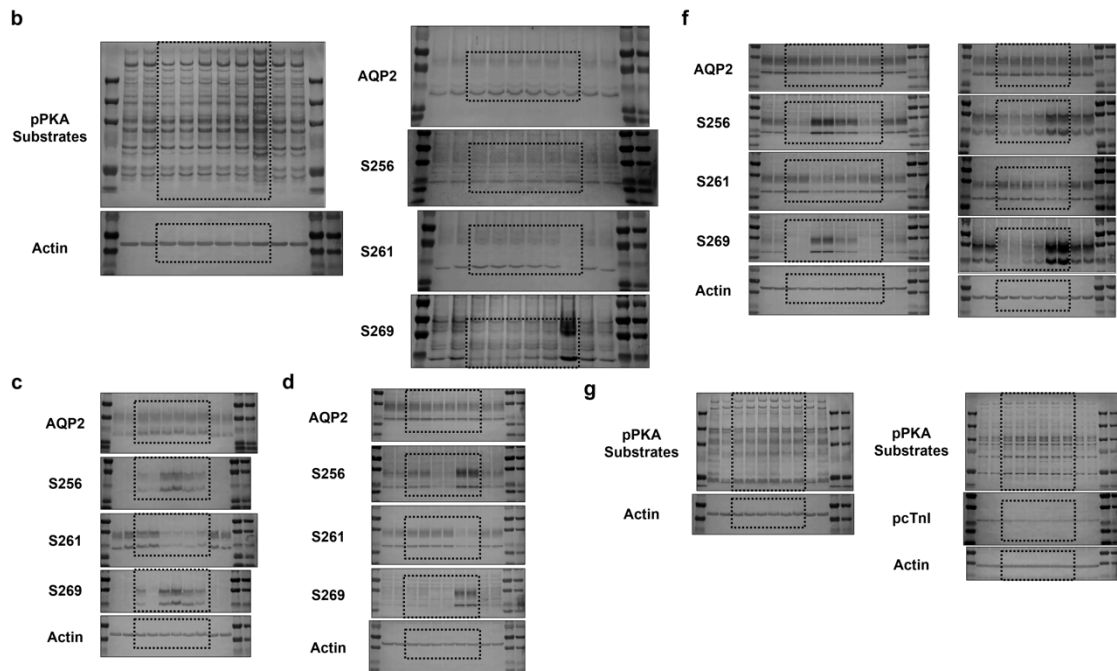

**Supplementary Figure 12.** Uncropped western blots of Figure 5.

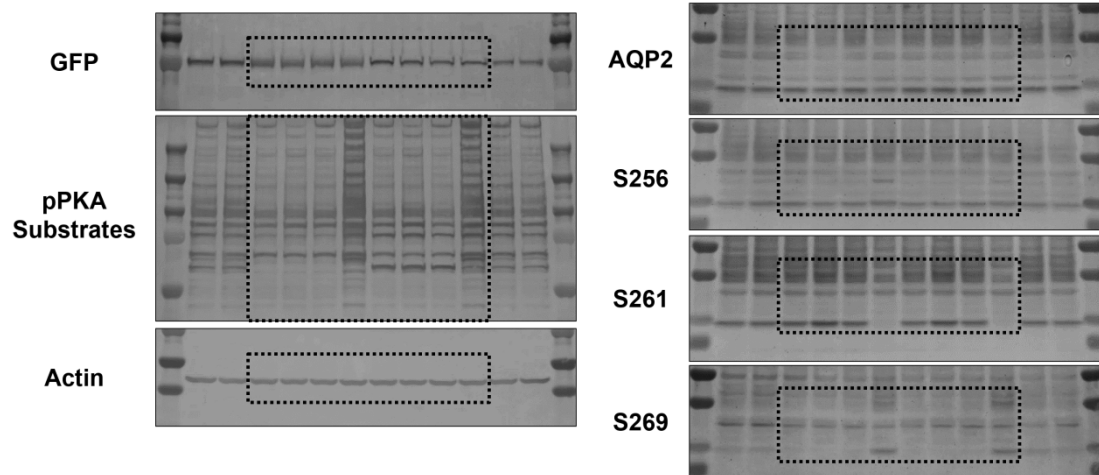

**Supplementary Figure 13.** Uncropped western blots of Supplementary Figure 4.

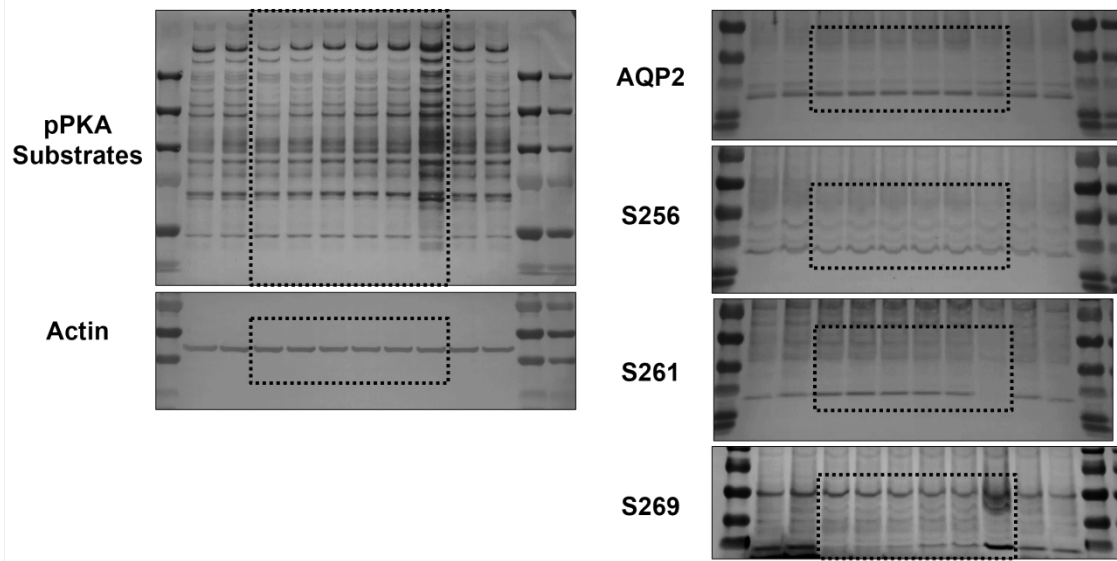

**Supplementary Figure 14.** Uncropped western blots of Supplementary Figure 7.



**Supplementary Table 1. Primer sequences**

| <b>Gene</b> | <b>Forward primer (5' →3' )</b> | <b>Reverse primer (5' →3' )</b> |
|-------------|---------------------------------|---------------------------------|
| Akap1       | AGA AGC AGA TCA CTC AGG AG      | TGG ATG TTC TGT GTG TAA GG      |
| Akap2       | GAG TCT GAT GTC ATG GTT GG      | TTC AGT TGT GGG GGA TGG         |
| Akap3       | TTT GTA CTT TGC TGG TGA CG      | CAT TTC CCA CTG CTT CAT CC      |
| Akap4       | GGA GAC TCT GGA AGA AAA AG      | TTC TGG AGA TCA TTG AGG AG      |
| Akap5       | AGA TTC AGG TAG AGA CGA AG      | TCG CTT TCT TCC TTC TCT TG      |
| Akap6       | AGA TAC TGG CTA CTG ATG TG      | TTC TTT CCT CTT GCT ACC AC      |
| Akap7       | CCA TTC GTT GAG GAG ATC C       | CTA GGA TGC CTT TTT CCC G       |
| Akap8       | TCA GGA GAT GAA GAA TTC AG      | CAT ACA GAA CAG GCA AAC TG      |
| Akap8l      | AGA AGG CAA AGA AGA TTC GG      | AGA GAG AAC ACA CAA ACT GG      |
| Akap9       | GGA AAG TTC TCA GAG GGT AG      | AAA TTC TTC TTC CTC CGA GC      |
| Akap10      | GAT ATC CTC TTC TGT GAG TC      | CTT GGA GGG AAA AGT ACT TG      |
| Akap11      | GGA GTA GTC ACC TAA AGA GC      | CTG GTT TAA ACA CTC TCC TC      |
| Akap12      | GGA AGA AGT CAC TGT TGA AG      | CTG TTC GAT TAT TTC CGG TG      |
| Akap13      | ATT CAG CCC CAT TCC TAT TG      | GAT TTT CTC TGC AGC CTT TG      |
| Akap14      | GAA ACC CCA TCA AGA ACA TC      | ATC AGC ATA ATA CAC CCA GC      |
| Akap17b     | GAA GGA GCT ATA CAG AGG AG      | TGG GCT TTC CTT ACT TCA TC      |
| Ezr         | TGG AAA TGT ATG GGA TCA AC      | GTT GAA AGA GAT GTT CCT G       |
| Map2        | TCT CTC TGA ATA GCT CCA TC      | AGT TGA TCC AGG GGT AGT AG      |
| Sphkap      | CGG TCC ATG AGT GAA TTA G       | TTG ATC ACC AGT AGG CTC C       |
| Wasf1       | TCA ATA TCC TCA CCC CTT AC      | CTG CTT TCT CTT TTC CTT CC      |
| Cbfa2t3     | TCG AAG AGT TTC ATG CCA AG      | TGC AGC AGT GGA AGA TTA G       |
